# Supplementary material
Source: HighWire-hosted journal article supplement (https://www.cmaj.ca/highwire/filestream/69678/field_highwire_adjunct_files/1/170289-res-2-at.pdf)

Appendix 2 (as supplied by the authors)

Figure 1a: CLEFT-Q face scale by how much participants like how their face looks overall

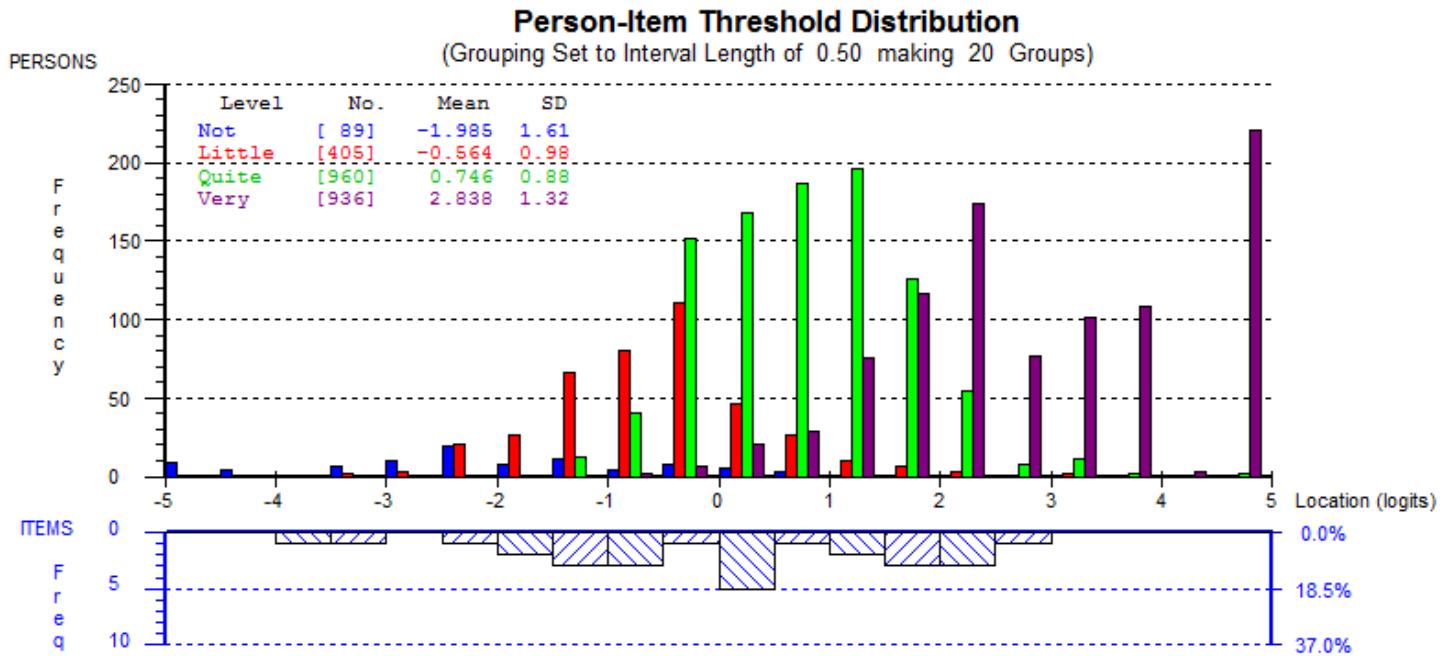

Figure 1b: CLEFT-Q speech function scale by current speech problem

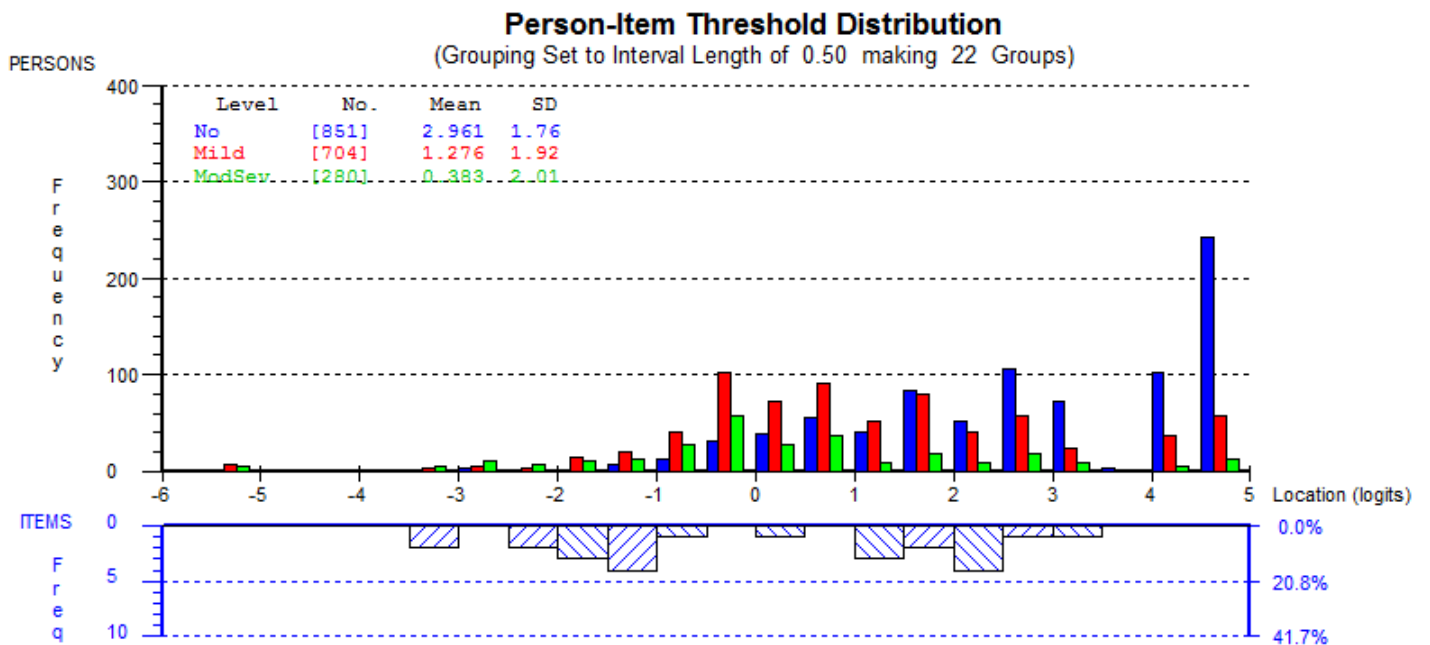

Appendix to: Klassen AF, Wong Riff KWY, Longmire NM et al. Psychometric findings and normative values for the CLEFT-Q based on 2434 children and young adult patients with cleft lip and/or palate from 12 countries. CMAJ 2018. doi: 10.1503/cmaj.170289. Copyright © 2018 Joule Inc. or its licensors

**Figure 1c:** CLEFT-Q psychological scale by how much participants like how their face looks overall

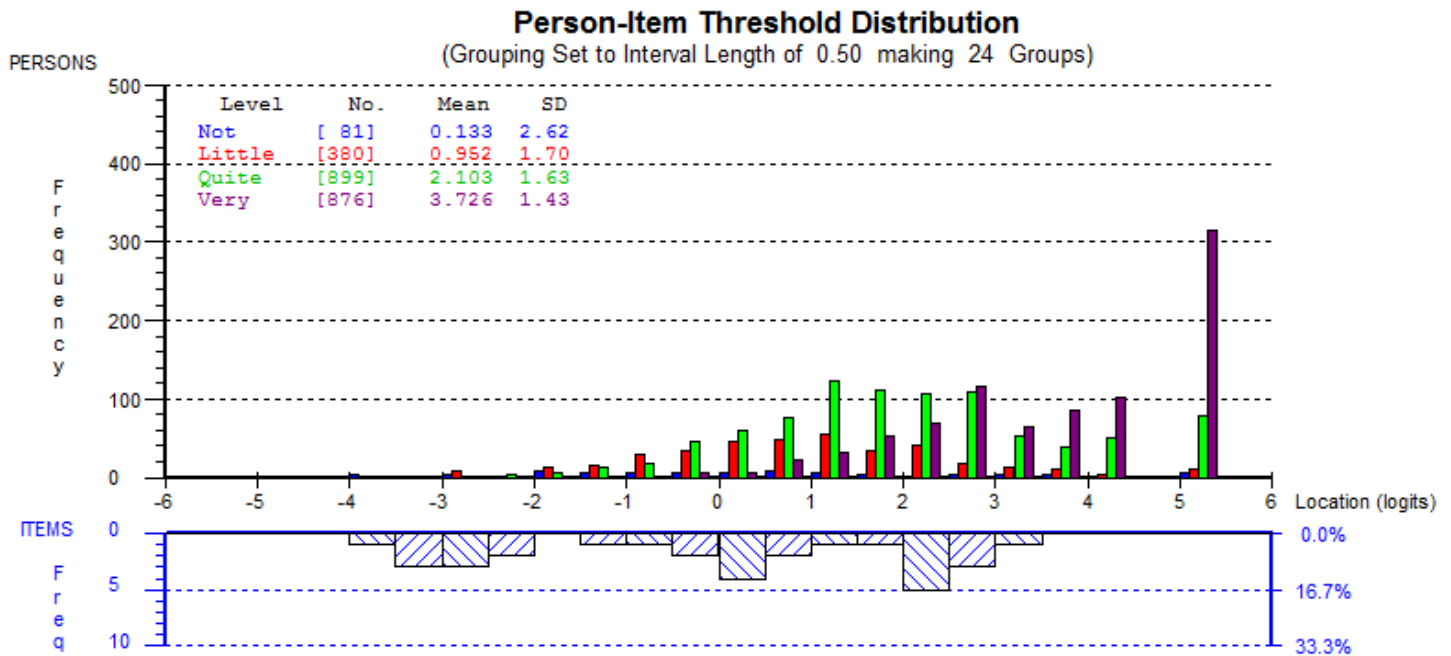

**Figure 1d:** CLEFT-Q psychological scale by current speech problem

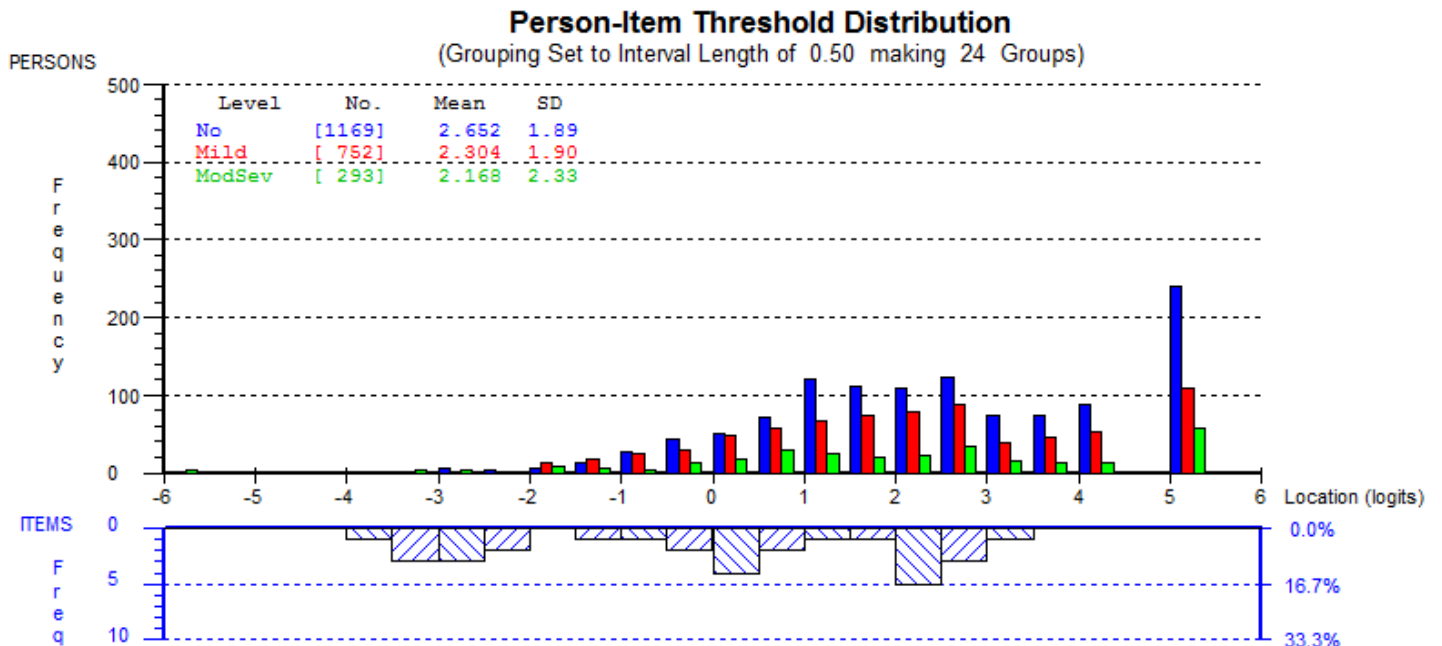

Supplement: 170289-res-2-at.pdf [file 170289-res-2-at.pdf]
